# Supplementary material for: Visible–ultraviolet dual-band photodetectors based on an all-inorganic CsPbCl3/p-GaN heterostructure
Source: Royal Society of Chemistry journal article supplement (doi:10.1039/d3na01009k), 2024-01-01
Supplement: d3na01009k1.pdf [file d3na01009k1.pdf]

## Supplementary Information

### Visible-ultraviolet dual-band photodetector based on all-inorganic CsPbCl<sub>3</sub>/p-GaN heterostructure

Bingjie Ye<sup>a</sup>, Boxiang Wang<sup>a</sup>, Yan Gu<sup>a</sup>, Jiarui Guo<sup>a</sup>, Xiumei Zhang<sup>a</sup>, Weiying Qian<sup>a</sup>, Xiangyang Zhang<sup>a</sup>, , Guofeng Yang<sup>a,\*</sup>, Zhixing Gan<sup>b,\*</sup> and Yushen Liu<sup>c,\*</sup>

<sup>a</sup> School of Internet of Things Engineering, Jiangnan University, Wuxi 214122, China

<sup>b</sup> Center for Future Optoelectronic Functional Materials, School of Computer and Electronic Information/School of Artificial Intelligence, Nanjing Normal University, Nanjing 210023, China

<sup>c</sup> Yancheng Polytechnic college, Yancheng 224005, China

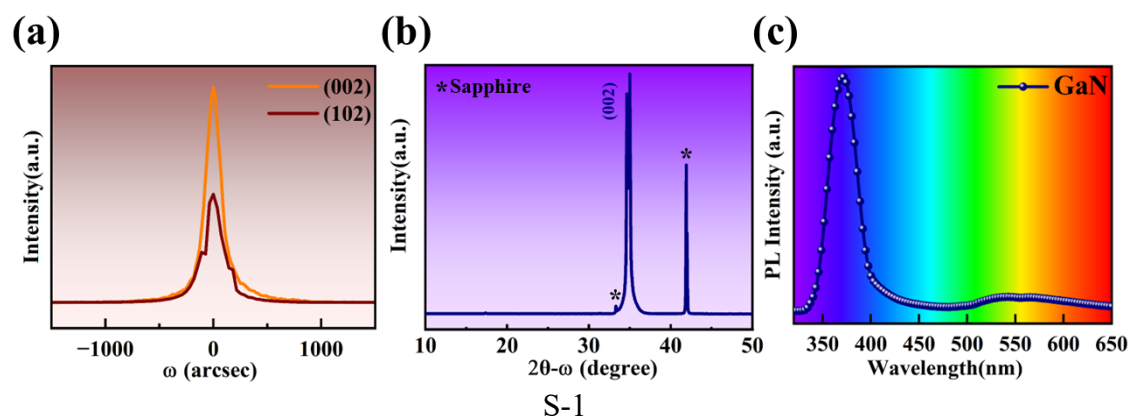

Fig. S1. (a) Rocking curve; (b)  $\omega$ -2 $\theta$  XRD scanning of (002) plane and (c) PL spectrum of GaN substrate.

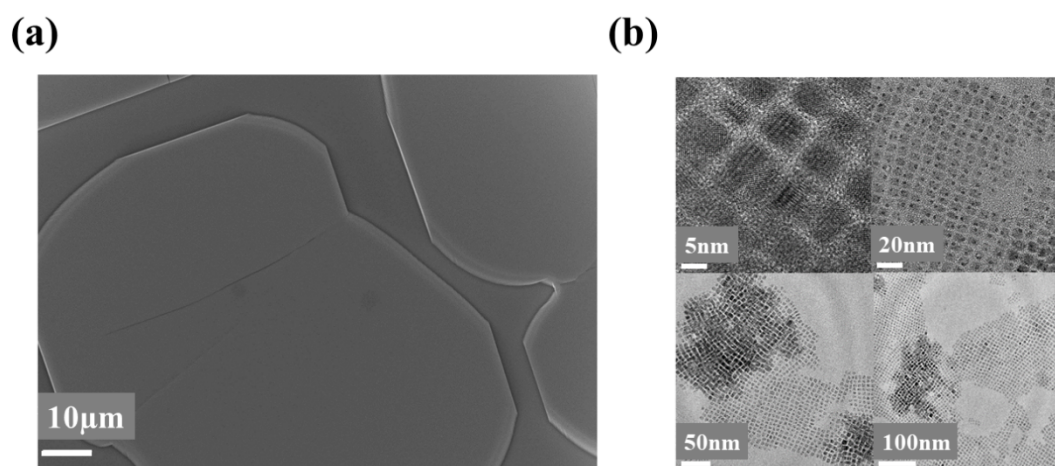

Fig. S2. (a) SEM images and (b) TEM images of  $\text{CsPbCl}_3$  nanocrystals at different scales.

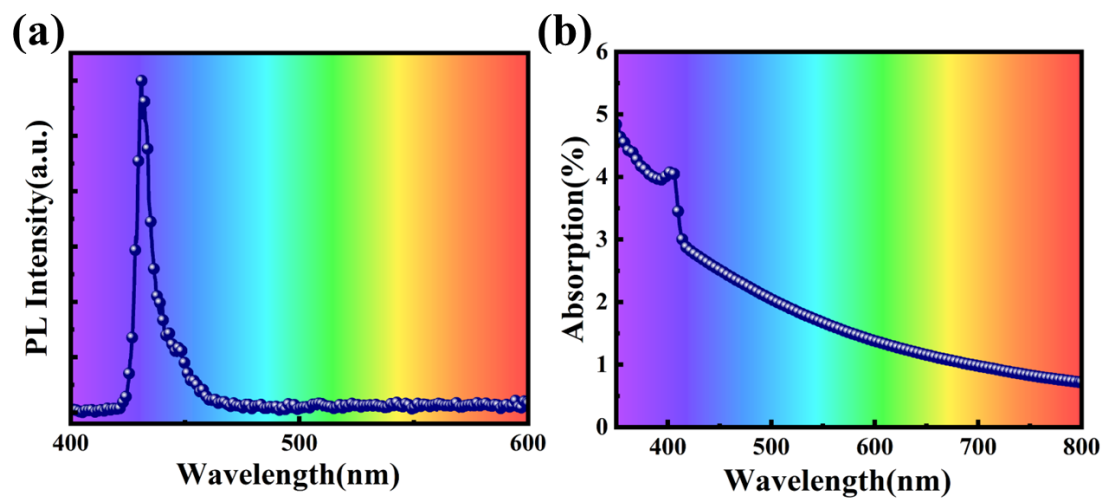

Fig. S3. (a) PL spectrum; (b) absorption spectrum of  $\text{CsPbCl}_3$  nanocrystal.

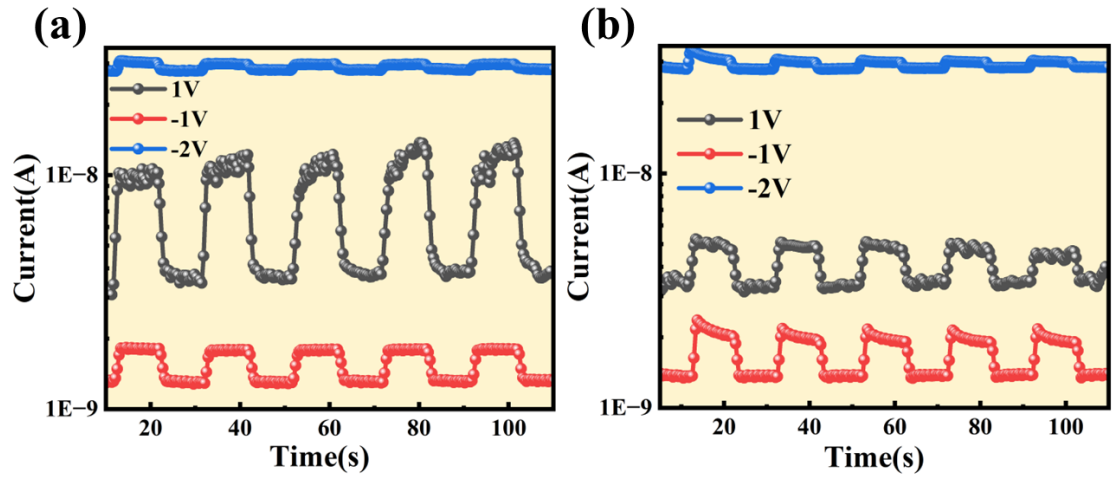

Fig. S4. Continuous switching modulation curves of devices under (a) 350 nm and (b) 420 nm illumination, with a period of 40 s.

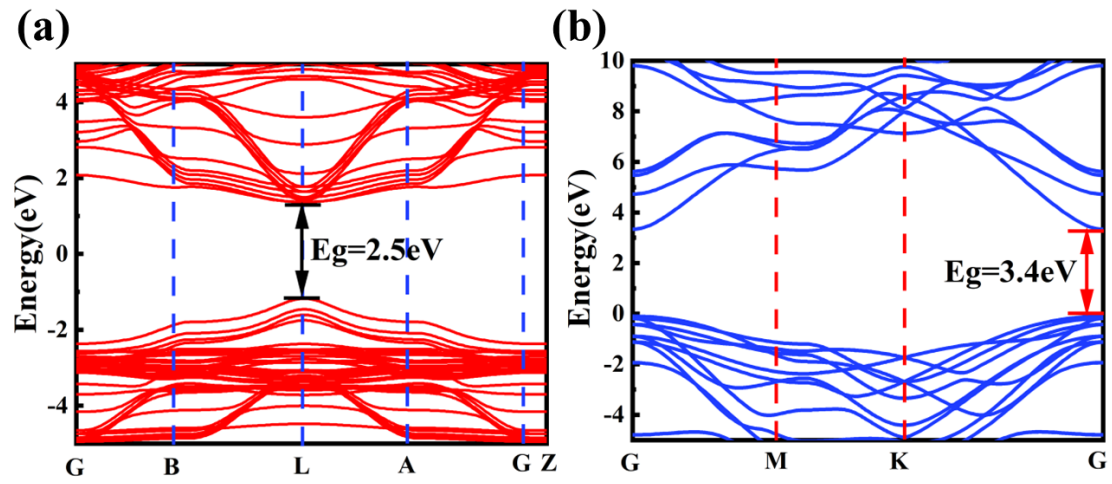

Fig. S5. (a) Energy band diagram of  $\text{CsPbCl}_3$ ; (b) energy band diagram of  $\text{GaN}$ .

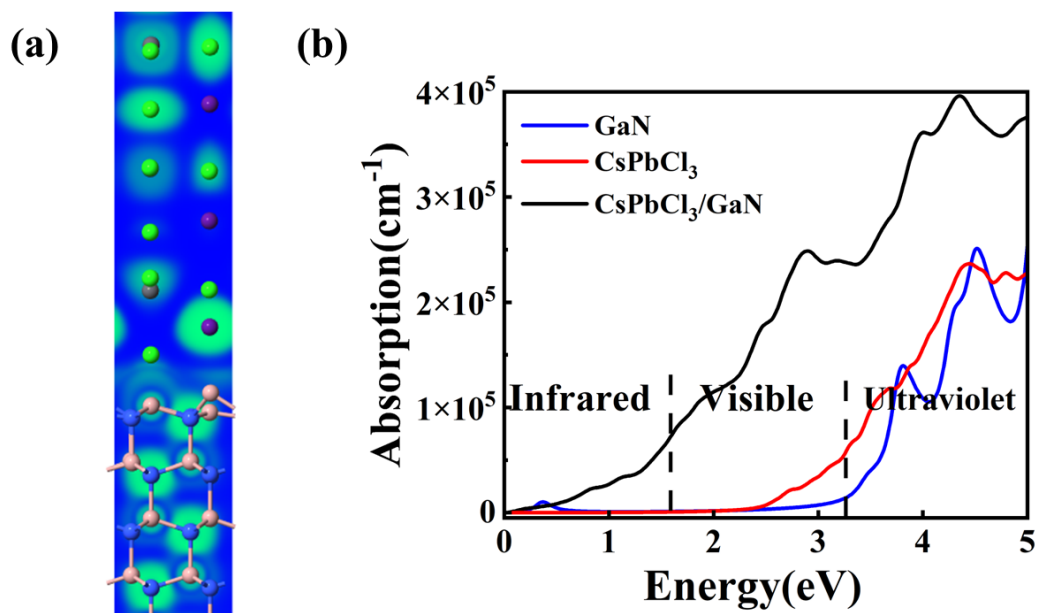

**Fig. S6.** (a) Heterojunction electron localization function; (b) The function diagram of absorption coefficient and light energy of isolated GaN, CsPbCl<sub>3</sub> and CsPbCl<sub>3</sub>/GaN heterojunction.
